# Supplementary material for: Analysis of Network Models with Neuron-Astrocyte Interactions
Source: Springer Nature journal article supplement (doi:10.1007/s12021-023-09622-w), 2023-03-23
Supplement: MOESM1 [file 24669836]

# Supplementary material: Analysis of network models with neuron-astrocyte interactions

Tiina Manninen, Jugoslava Aćimović, and Marja-Leena Linne

January 24, 2023

Faculty of Medicine and Health Technology, Tampere University, Tampere, Finland  
Emails: tiina.manninen@tuni.fi, marja-leena.linne@tuni.fi

We have provided three tables as supplementary material. Table S1 lists the model references used to build the neuron-astrocyte network models. Tables S2 and S3 characterize modeled neurons and astrocyte in the neuron-astrocyte network models, respectively.

Table S1: Model references used to build the neuron-astrocyte network models. This table shows the model references used to build the neurons and astrocytes as well as the interactions between neurons (NN), from neurons to astrocytes (NA), from astrocytes to neurons (AN), and between astrocytes (AA). Under Astrocytic references, we list only references related to astrocytes and, for example, the references related to gap junctions are under AA references.

| Study                   | Neuronal refs.                                | Astrocytic refs.                                                                                                                                | NN refs.                                           | NA refs.                                                                                         | AN refs.                                                              | AA refs.                                                                         |
|-------------------------|-----------------------------------------------|-------------------------------------------------------------------------------------------------------------------------------------------------|----------------------------------------------------|--------------------------------------------------------------------------------------------------|-----------------------------------------------------------------------|----------------------------------------------------------------------------------|
| Abled et al. (2020)     | Izhikevich (2003)                             | Destexhe et al. (1994)                                                                                                                          | Izhikevich (2003)                                  | Destexhe et al. (1994)                                                                           | Postnov et al. (2007, 2009)                                           | Ullah et al. (2006)                                                              |
| Aleksin et al. (2017)   | Hodgkin & Huxley (1952); Kopell et al. (2010) | De Young & Keizer (1992); Li & Rinzel (1994); Nadkarni & Jung (2003); Volman et al. (2007)                                                      | Olufsen et al. (2003)                              | Tsodyks et al. (1998); Volman et al. (2007)                                                      | Volman et al. (2007)                                                  | Ullah et al. (2006)                                                              |
| Allegrini et al. (2009) | Izhikevich (2003)                             | De Young & Keizer (1992); Atri et al. (1993); Höfer et al. (2002); Nadkarni & Jung (2003)                                                       | Izhikevich (2003)                                  | Nadkarni & Jung (2003)                                                                           | Nadkarni & Jung (2003)                                                | Sneyd et al. (1995); Höfer et al. (2002)                                         |
| Amiri et al. (2012a)    | Morris & Lecar (1981); Volman et al. (2007)   | De Young & Keizer (1992); Li & Rinzel (1994); Nadkarni & Jung (2003); Volman et al. (2007)                                                      | Destexhe et al. (1994, 1998); Terman et al. (2002) | Destexhe et al. (1994); Terman et al. (2002); Volman et al. (2007)                               | Volman et al. (2007)                                                  | Ullah et al. (2006)                                                              |
| Amiri et al. (2012b)    | Suffczynski et al. (2004)                     | Dupont & Goldbeter (1993); Sneyd et al. (1994); Kopell et al. (2000); Postnov et al. (2007, 2009)                                               | Suffczynski et al. (2004)                          | Suffczynski et al. (2004); Postnov et al. (2007, 2009)                                           | Postnov et al. (2007, 2009); Amiri et al. (2011)                      | Ullah et al. (2006)                                                              |
| Amiri et al. (2012c)    | Suffczynski et al. (2004)                     | Dupont & Goldbeter (1993); Sneyd et al. (1994); Kopell et al. (2000); Postnov et al. (2007, 2009)                                               | Suffczynski et al. (2004)                          | Suffczynski et al. (2004); Postnov et al. (2007, 2009)                                           | Postnov et al. (2007, 2009); Amiri et al. (2011)                      | Ullah et al. (2006)                                                              |
| Amiri et al. (2013a)    | Morris & Lecar (1981); Volman et al. (2007)   | De Young & Keizer (1992); Li & Rinzel (1994); Nadkarni & Jung (2003); Volman et al. (2007)                                                      | Destexhe et al. (1994, 1998); Terman et al. (2002) | Destexhe et al. (1994); Terman et al. (2002); Volman et al. (2007)                               | Volman et al. (2007); Amiri et al. (2012a)                            | Ullah et al. (2006)                                                              |
| Chan et al. (2017)      | Morris & Lecar (1981); Prescott et al. (2008) | De Young & Keizer (1992); Li & Rinzel (1994); Nadkarni & Jung (2003); Volman et al. (2007)                                                      | Latham et al. (2000)                               | Nadkarni & Jung (2003)                                                                           | Volman et al. (2007); Amiri et al. (2012a)                            | Ullah et al. (2006)                                                              |
| Gordleeva et al. (2019) | Hodgkin & Huxley (1952); Esir et al. (2018)   | De Young & Keizer (1992); Li & Rinzel (1994); Höfer et al. (2002); De Pittà et al. (2009); Gordleeva et al. (2018)                              | Tsodyks et al. (1998); Gordleeva et al. (2012)     | Tsodyks et al. (1998); De Pittà et al. (2009); De Pittà & Brunel (2016); Gordleeva et al. (2012) | Gordleeva et al. (2012)                                               | Ullah et al. (2006); Kazantsev (2009); Li et al. (2016); Gordleeva et al. (2018) |
| Haghiri et al. (2016)   | Izhikevich (2003)                             | Dupont & Goldbeter (1993); Sneyd et al. (1994); Kopell et al. (2000); Postnov et al. (2007, 2009)                                               | Kopell et al. (2000); Postnov et al. (2007, 2009)  | Kopell et al. (2000); Postnov et al. (2007, 2009)                                                | Kopell et al. (2000); Postnov et al. (2007, 2009)                     | n/a                                                                              |
| Haghiri et al. (2017)   | Izhikevich (2003)                             | Dupont & Goldbeter (1993); Sneyd et al. (1994); Kopell et al. (2000); Postnov et al. (2007, 2009)                                               | Kopell et al. (2000); Postnov et al. (2007, 2009)  | Kopell et al. (2000); Postnov et al. (2007, 2009)                                                | Kopell et al. (2000); Postnov et al. (2007, 2009)                     | None                                                                             |
| Haghiri & Ahmadi (2020) | Izhikevich (2003)                             | Dupont & Goldbeter (1993); Sneyd et al. (1994); Kopell et al. (2000); Postnov et al. (2007, 2009)                                               | Kopell et al. (2000); Postnov et al. (2007, 2009)  | Kopell et al. (2000); Postnov et al. (2007, 2009)                                                | Kopell et al. (2000); Postnov et al. (2007, 2009)                     | None                                                                             |
| Hayati et al. (2016)    | FitzHugh (1961)                               | Dupont & Goldbeter (1993); Sneyd et al. (1994); Kopell et al. (2000); Postnov et al. (2007, 2009)                                               | Kopell et al. (2000); Postnov et al. (2007, 2009)  | Kopell et al. (2000); Postnov et al. (2007, 2009)                                                | Kopell et al. (2000); Postnov et al. (2007, 2009)                     | n/a                                                                              |
| Kanakov et al. (2019)   | Hodgkin & Huxley (1952)                       | De Young & Keizer (1992); Dupont & Goldbeter (1993); Li & Rinzel (1994); Höfer et al. (2002); Nadkarni & Jung (2003, 2005); Ullah et al. (2006) | Destexhe et al. (1994, 1998)                       | n/a                                                                                              | Volman et al. (2007); De Pittà et al. (2011); Gordleeva et al. (2012) | Kazantsev (2009)                                                                 |

Table S1: Model references used to build the neuron-astrocyte network models – Continued

| Study                  | Neuronal refs.                                                                                    | Astrocytic refs.                                                                                                                                                                             | NN refs.                                                                                      | NA refs.                                                                                 | AN refs.                                                                | AA refs.                                                          |
|------------------------|---------------------------------------------------------------------------------------------------|----------------------------------------------------------------------------------------------------------------------------------------------------------------------------------------------|-----------------------------------------------------------------------------------------------|------------------------------------------------------------------------------------------|-------------------------------------------------------------------------|-------------------------------------------------------------------|
| Lenk et al. (2020)     | Lenk et al. (2016)                                                                                | De Young & Keizer (1992); Li & Rinzel (1994); Nadkarni & Jung (2003); Volman et al. (2007); De Pittà et al. (2008); Lallouette et al. (2014)                                                 | Tsodyks et al. (1998); De Pittà et al. (2011)                                                 | Tsodyks et al. (1998); Volman et al. (2007)                                              | De Pittà et al. (2011); Lenk et al. (2016)                              | Lallouette et al. (2014)                                          |
| Li et al. (2016)       | Hodgkin & Huxley (1952); Ma et al. (2012)                                                         | De Young & Keizer (1992); Li & Rinzel (1994); Nadkarni & Jung (2003); Volman et al. (2007); Sahlander et al. (2014)                                                                          | Destexhe et al. (1994, 1998); Terman et al. (2002)                                            | Terman et al. (2002); Volman et al. (2007)                                               | Postnov et al. (2007, 2009)                                             | Ullah et al. (2006); Kazantsev (2009)                             |
| Li et al. (2020)       | Jahr & Stevens (1990); Destexhe et al. (1994); Gerstner & Kistler (2002); Silchenko & Tass (2008) | De Young & Keizer (1992); Li & Rinzel (1994); Nadkarni & Jung (2003, 2005); Ullah et al. (2006); Li et al. (2017)                                                                            | Destexhe et al. (1998); Tsodyks et al. (1998); Terman et al. (2002); De Pittà & Brunel (2016) | Tsodyks et al. (1998); Nadkarni & Jung (2005); De Pittà & Brunel (2016)                  | Destexhe et al. (1998); Tsodyks et al. (1998); De Pittà & Brunel (2016) | Goldberg et al. (2010)                                            |
| Liu & Li (2013a)       | Gerstner & Kistler (2002); Guo & Li (2011)                                                        | De Young & Keizer (1992); Atri et al. (1993); Dupont & Goldbeter (1993); Li & Rinzel (1994); Höfer et al. (2002); Nadkarni & Jung (2003, 2005); Ullah et al. (2006); Allegrini et al. (2009) | Guo & Li (2011)                                                                               | Nadkarni & Jung (2005)                                                                   | Nadkarni & Jung (2003)                                                  | Sneyd et al. (1995); Höfer et al. (2002); Allegrini et al. (2009) |
| Liu & Li (2013b)       | Hodgkin & Huxley (1952); Gerstner & Kistler (2002)                                                | De Young & Keizer (1992); Atri et al. (1993); Dupont & Goldbeter (1993); Li & Rinzel (1994); Höfer et al. (2002); Nadkarni & Jung (2003); Ullah et al. (2006); Allegrini et al. (2009)       | Gerstner & Kistler (2002)                                                                     | Nadkarni & Jung (2003)                                                                   | Nadkarni & Jung (2003)                                                  | Sneyd et al. (1995); Höfer et al. (2002); Allegrini et al. (2009) |
| Liu et al. (2016)      | Gerstner & Kistler (2002); Wade et al. (2012)                                                     | De Young & Keizer (1992); Li & Rinzel (1994); Nadkarni & Jung (2003); Volman et al. (2007); Wade et al. (2012); Naeem et al. (2015)                                                          | Volman et al. (2007); Wade et al. (2012)                                                      | Volman et al. (2007); Wade et al. (2012)                                                 | Tsodyks et al. (2007); (1998); Wade et al. (2012)                       | Ullah et al. (2006); Goldberg et al. (2010)                       |
| Makovkin et al. (2020) | Hodgkin & Huxley (1952); Mainen et al. (1995); Mainen & Sejnowski (1996)                          | De Young & Keizer (1992); Dupont & Goldbeter (1993); Li & Rinzel (1994); Höfer et al. (2002); Nadkarni & Jung (2003, 2005); Ullah et al. (2006)                                              | Kanakov et al. (2019)                                                                         | Tsodyks et al. (1998); Gordleeva et al. (2019)                                           | Kanakov et al. (2019)                                                   | Kazantsev (2009)                                                  |
| Mesiti et al. (2015)   | Pinsky & Rinzel (1994)                                                                            | De Young & Keizer (1992); Sneyd et al. (1994); Nadkarni & Jung (2003); Larter & Craig (2005); Silchenko & Tass (2008)                                                                        | Destexhe et al. (1994, 1998)                                                                  | Nadkarni & Jung (2003)                                                                   | Destexhe et al. (1994, 1998); Nadkarni & Jung (2003, 2007)              | Ullah et al. (2006)                                               |
| Naeem et al. (2015)    | Gerstner & Kistler (2002); Wade et al. (2012)                                                     | De Young & Keizer (1992); Li & Rinzel (1994); Nadkarni & Jung (2003); Volman et al. (2007); Wade et al. (2012)                                                                               | Volman et al. (2007); Wade et al. (2012)                                                      | Volman et al. (2007); Wade et al. (2012)                                                 | Tsodyks et al. (2007); (1998); Wade et al. (2012)                       | Ullah et al. (2006); Goldberg et al. (2010)                       |
| Nazari & Faez (2019)   | Izhikevich (2003)                                                                                 | De Young & Keizer (1992); Li & Rinzel (1994); Nadkarni & Jung (2003); Volman et al. (2007)                                                                                                   | Mazzoni et al. (2008)                                                                         | Destexhe et al. (1994); Terman et al. (2002); Volman et al. (2007)                       | Postnov et al. (2007, 2009); Amiri et al. (2013b)                       | Ullah et al. (2006)                                               |
| Nazari et al. (2020)   | Gerstner & Kistler (2002); Mazzoni et al. (2008)                                                  | De Young & Keizer (1992); Li & Rinzel (1994); Nadkarni & Jung (2003); Volman et al. (2007)                                                                                                   | Mazzoni et al. (2008)                                                                         | Destexhe et al. (1994); Terman et al. (2002); Volman et al. (2007); Nazari & Faez (2019) | Postnov et al. (2007, 2009); Amiri et al. (2013b)                       | Ullah et al. (2006)                                               |
| Postnov et al. (2009)  | FitzHugh (1961)                                                                                   | Dupont & Goldbeter (1993); Sneyd et al. (1994); Kopell et al. (2000); Postnov et al. (2007)                                                                                                  | Kopell et al. (2000); Postnov et al. (2007)                                                   | Kopell et al. (2000); Postnov et al. (2007)                                              | Kopell et al. (2000); Postnov et al. (2007)                             | Ullah et al. (2006)                                               |

Continued on next page

Table S1: Model references used to build the neuron-astrocyte network models – Continued

| Study                   | Neuronal refs.                                                  | Astrocytic refs.                                                                                                                                              | NN refs.                                                             | NA refs.                                                                | AN refs.                                                                | AA refs.                                                |
|-------------------------|-----------------------------------------------------------------|---------------------------------------------------------------------------------------------------------------------------------------------------------------|----------------------------------------------------------------------|-------------------------------------------------------------------------|-------------------------------------------------------------------------|---------------------------------------------------------|
| Soleimani et al. (2015) | Reddy et al. (2000)                                             | Dupont & Goldbeter (1993); Sneyd et al. (1994); Postnov et al. (2007, 2009)                                                                                   | Kopell et al. (2000); Postnov et al. (2007, 2009)                    | Postnov et al. (2007, 2009)                                             | Postnov et al. (2007, 2009); Amiri et al. (2013b)                       | None                                                    |
| Stimberg et al. (2019)  | Dayan & Abbott (2001)                                           | De Young & Keizer (1992); Li & Rinzel (1994); Höfer et al. (2002); Shuai & Jung (2002); De Pittà et al. (2009); Goldberg et al. (2010); Wallach et al. (2014) | Tsodyks et al. (1998); Dayan & Abbott (2001); De Pittà et al. (2011) | Tsodyks et al. (1998); De Pittà et al. (2009); De Pittà & Brunel (2016) | Tsodyks et al. (1998); De Pittà et al. (2011); De Pittà & Brunel (2016) | Lallouette et al. (2014)                                |
| Tang et al. (2017)      | Izhikevich (2003)                                               | De Young & Keizer (1992); Li & Rinzel (1994); Höfer et al. (2002); Nadkarni & Jung (2003); Allegrini et al. (2009); De Pittà et al. (2009)                    | Izhikevich (2003)                                                    | Allegrini et al. (2009)                                                 | Nadkarni & Jung (2003)                                                  | Goldberg et al. (2010)                                  |
| Yang & Yeo (2015)       | n/a                                                             | De Young & Keizer (1992); Li & Rinzel (1994); Nadkarni & Jung (2003); Volman et al. (2007); De Pittà et al. (2009)                                            | n/a                                                                  | Volman et al. (2007)                                                    | n/a                                                                     | n/a                                                     |
| Yao et al. (2018)       | Hodgkin & Huxley (1952); Kager et al. (2000); Yao et al. (2011) | De Young & Keizer (1992); Li & Rinzel (1994); Fink et al. (1999); Kager et al. (2000); Lemon et al. (2003); Bennett et al. (2005); Somjen et al. (2008)       | Destexhe et al. (1998); Bennett et al. (2008); Yao et al. (2011)     | Yao et al. (2011)                                                       | Bennett et al. (2008); Yao et al. (2011)                                | Lemon et al. (2003); Bennett et al. (2005, 2008)        |
| Yu et al. (2020)        | Morris & Lecar (1981); Volman et al. (2007)                     | De Young & Keizer (1992); Li & Rinzel (1994); Nadkarni & Jung (2003); Volman et al. (2007)                                                                    | Destexhe et al. (1994, 1998); Terman et al. (2002)                   | Destexhe et al. (1994); Terman et al. (2002); Volman et al. (2007)      | Volman et al. (2007); Amiri et al. (2012a)                              | Ullah et al. (2006); Kazantsev (2009); Li et al. (2016) |

Table S2: Characteristics of modeled neurons in the neuron-astrocyte network models. This table shows the inputs to the neurons, neuronal variables and other variables representing, for example, molecules released from neurons described by differential equations, as well as neuronal ionic currents and outputs of the neurons. We did not highlight the components, such as  $V_m$ , as neuronal unless we especially meant that they are, for example, either pre- or postsynaptic components. Amounts modeled in concentrations are given inside square brackets. We did not separate  $I_{syn}$  here into EE, EI, IE, and II connections. Note that synaptic conductance can be written as  $g_{syn} = \bar{g}_{syn}s_{syn}$ , where synaptic gating variable  $s_{syn}$  can be, for example,  $s_{EE}$ .  $I_{astro} = 2.11\mathcal{H}(\ln(\Delta Ca)) \ln(\Delta Ca)$ , where  $\mathcal{H}$  is the heaviside function and  $\Delta Ca = [Ca^{2+}]_{ast} - 196.69$ (nM) (Nadkarni & Jung, 2003).

| Study                   | Inputs                                                                                                                                                                                                                                                                                                                                                          | Variables                                                                                                                                                                                                                                                        | Ionic currents                        | Outputs                                                                  |
|-------------------------|-----------------------------------------------------------------------------------------------------------------------------------------------------------------------------------------------------------------------------------------------------------------------------------------------------------------------------------------------------------------|------------------------------------------------------------------------------------------------------------------------------------------------------------------------------------------------------------------------------------------------------------------|---------------------------------------|--------------------------------------------------------------------------|
| Abed et al. (2020)      | $I_{ast} \rightarrow V_m, post$ (Glu <sub>ext</sub> ), $S \rightarrow V_m, post$                                                                                                                                                                                                                                                                                | $u, V_m$                                                                                                                                                                                                                                                         | None                                  | NT, $V_m$                                                                |
| Aleksin et al. (2017)   | $[Ca^{2+}]_{ast} \rightarrow p_{syn,rel}, I_{appl} \rightarrow V_m, I_{phasic} \rightarrow V_m, g_{tonic}, h_{Na}, h_{phasic}, m_{Na}, m_{phasic}, n_K, [NT], s_{EE}, s_{EI}, I_{syn} \rightarrow V_m, post, I_{tonic} \rightarrow V_m$                                                                                                                         | $V_m, s_{IE}, s_{II}, V_m, W_{syn}$                                                                                                                                                                                                                              | $I_K, I_{Na}, I_{leak}$               | $I_{syn}, [NT]$                                                          |
| Allegrini et al. (2009) | $I_{astro} \rightarrow V_m, post, S \rightarrow V_m, post$                                                                                                                                                                                                                                                                                                      | $u, V_m$                                                                                                                                                                                                                                                         | None                                  | $V_m$                                                                    |
| Amiri et al. (2012a)    | $I_{ast} \rightarrow V_m, PY/IN, I_{const} \rightarrow V_m, I_{noise} \rightarrow V_m, I_{syn} \rightarrow V_m, post$ (NT)                                                                                                                                                                                                                                      | $I_{slow}, s_E, s_I, V_m, W \approx n_K$                                                                                                                                                                                                                         | $I_{Ca}, I_{KDR}, I_{leak}, I_{slow}$ | $I_{syn}, NT$                                                            |
| Amiri et al. (2012b)    | $G_m \rightarrow C_{gain}, I_{GWnoise} \rightarrow V_m, I_{syn,AMPA}/GABAAR/GABABR \rightarrow V_m, post$                                                                                                                                                                                                                                                       | $F, s_{AMPA}, s_{GABAAR}, s_{GABABR}, V_m$                                                                                                                                                                                                                       | $I_{CaT}, I_K, I_{Na}, I_{leak}$      | $F_{PY}, I_{syn,AMPA}, I_{syn,GABAAR}, I_{syn,GABABR}$                   |
| Amiri et al. (2012c)    | $G_m \rightarrow C_{gain}, I_{GWnoise} \rightarrow V_m, I_{syn,AMPA}/GABAAR/GABABR \rightarrow V_m, post$                                                                                                                                                                                                                                                       | $F, s_{AMPA}, s_{GABAAR}, s_{GABABR}, V_m$                                                                                                                                                                                                                       | $I_{CaT}, I_K, I_{Na}, I_{leak}$      | $F_{PY}, I_{syn,AMPA}, I_{syn,GABAAR}, I_{syn,GABABR}$                   |
| Amiri et al. (2013a)    | $I_{ast} \rightarrow V_m, PY/IN, I_{const} \rightarrow V_m, I_{noise} \rightarrow V_m, I_{syn} \rightarrow V_m, post$ (NT)                                                                                                                                                                                                                                      | $I_{slow}, s_E, s_I, V_m, W \approx n_K$                                                                                                                                                                                                                         | $I_{Ca}, I_{KDR}, I_{leak}, I_{slow}$ | $I_{syn}, NT$                                                            |
| Chan et al. (2017)      | $I_{ast} \rightarrow V_m, E/I, I_{syn} \rightarrow V_m, post, I_{unnoise} \rightarrow V_m$                                                                                                                                                                                                                                                                      | $s_{EE}, s_{EI}, s_{IE}, s_{II}, V_m, W \approx n_K, q_{sAHP}$                                                                                                                                                                                                   | $I_K, I_{Na}, I_{sAHP}, I_{leak}$     | $I_{syn}, V_m$                                                           |
| Gordleeva et al. (2019) | $I_{const} \rightarrow V_m, I_{poisson} \rightarrow V_m, I_{syn,NMDAR} \rightarrow V_m, post$ (D-serine <sub>ext</sub> , Glu <sub>ext</sub> , Glu <sub>syn</sub> )                                                                                                                                                                                              | $Glu_{syn}, h_{Na}, I_{syn,NMDAR}, m_{Na}, n_K, V_m$                                                                                                                                                                                                             | $I_K, I_{Na}, I_{leak}$               | $Glu_{syn}, I_{syn,NMDAR}$                                               |
| Haghiri et al. (2016)   | $I_{appl} \rightarrow V_m, pre, I_{ast} \rightarrow V_m, post, I_{syn} \rightarrow V_m, post$                                                                                                                                                                                                                                                                   | $u, V_m, z$                                                                                                                                                                                                                                                      | None                                  | $I_{syn}, u, z$                                                          |
| Haghiri et al. (2017)   | $I_{appl} \rightarrow V_m, pre, I_{ast,ATP}/Glu \rightarrow V_m, post, I_{syn} \rightarrow V_m, post$                                                                                                                                                                                                                                                           | $u, V_m, z$                                                                                                                                                                                                                                                      | None                                  | $I_{syn}, u, z$                                                          |
| Haghiri & Ahmadi (2020) | $I_{appl} \rightarrow V_m, pre, I_{ast} \rightarrow V_m, post, I_{syn} \rightarrow V_m, post$                                                                                                                                                                                                                                                                   | $u, V_m, z$                                                                                                                                                                                                                                                      | None                                  | $I_{syn}, u, z$                                                          |
| Hayati et al. (2016)    | $I_{appl} \rightarrow V_m, pre, I_{ast} \rightarrow V_m, post, I_{syn} \rightarrow V_m, post$                                                                                                                                                                                                                                                                   | $V_m, w, z$                                                                                                                                                                                                                                                      | None                                  | $I_{syn}, w, z$                                                          |
| Kanakov et al. (2019)   | $[Ca^{2+}]_{ast} \rightarrow g_{syn}, I_{const} \rightarrow V_m, I_{poisson} \rightarrow V_m, I_{syn} \rightarrow V_m, post$                                                                                                                                                                                                                                    | $h_{Na}, m_{Na}, n_K, V_m$                                                                                                                                                                                                                                       | $I_K, I_{Na}, I_{leak}$               | $I_{syn}$                                                                |
| Lenk et al. (2020)      | $[Ca^{2+}]_{ast} \rightarrow s_{Rpre} \rightarrow p_{syn,rel}, I_{syn} \rightarrow F_{post}$ (NT), $I_{noise} \rightarrow F, S_{ast} \rightarrow F_{post}$                                                                                                                                                                                                      | $p_{spike}, s_{Rpre}, u_{syn}, x_{syn}$                                                                                                                                                                                                                          | None                                  | NT                                                                       |
| Li et al. (2016)        | $I_{ast,ATP} \rightarrow V_m, PY$ ([ATP] <sub>ext</sub> ), $I_{ast,Glu} \rightarrow V_m, IN$ (Glu <sub>ext</sub> ), $I_{const} \rightarrow V_m, I_{syn} \rightarrow V_m, post$ (NT)                                                                                                                                                                             | $h_{Na}, m_{Na}, n_K, s_{IN}, s_{PY}, V_m$                                                                                                                                                                                                                       | $I_K, I_{Na}, I_{leak}$               | $I_{syn}, NT$                                                            |
| Li et al. (2020)        | $[GABA]_{ext} \rightarrow s_{GABABRpre} \rightarrow p_{syn,rel}, [Glu]_{ext} \rightarrow s_{mGluRpre} \rightarrow p_{syn,rel}, I_{ast,AMPA}/NMDAR \rightarrow V_m, post$ ((Glu <sub>ext</sub> ), $I_{const} \rightarrow V_m, I_{syn,AMPA}/NMDAR \rightarrow V_m, post$ ((Glu <sub>syn</sub> ), $I_{syn,GABAAR} \rightarrow V_m, post$ ((GABA <sub>syn</sub> ))) | $[GABA]_{syn}, [Glu]_{syn}, s_{AMPApost}$ (separately for [Glu] <sub>ext</sub> and [Glu] <sub>syn</sub> ), $s_{GABAARpost}, s_{GABABRpre}, s_{mGluRpre}, s_{NMDARpost}$ (separately for [Glu] <sub>ext</sub> and [Glu] <sub>syn</sub> ), $u_{syn}, V_m, x_{syn}$ | $I_{leak}$                            | $[GABA]_{syn}, [Glu]_{syn}, I_{syn,AMPA}, I_{syn,GABAAR}, I_{syn,NMDAR}$ |

Continued on next page

Table S2: Characteristics of modeled neurons in the neuron-astrocyte network models – Continued

| Study                   | Inputs                                                                                                                                                                                                                                                                                                                                                               | Variables                                                                                                                                                                                                               | Ionic currents                                                                                                                                                                                                                     | Outputs                                                                   |
|-------------------------|----------------------------------------------------------------------------------------------------------------------------------------------------------------------------------------------------------------------------------------------------------------------------------------------------------------------------------------------------------------------|-------------------------------------------------------------------------------------------------------------------------------------------------------------------------------------------------------------------------|------------------------------------------------------------------------------------------------------------------------------------------------------------------------------------------------------------------------------------|---------------------------------------------------------------------------|
| Liu & (2013a)           | $I_{astro} \rightarrow V_m, I_{Gnoise} \rightarrow V_m, pre, I_{GWnoise} \rightarrow V_m, sE, sI, V_m$                                                                                                                                                                                                                                                               | $sE, sI, V_m$                                                                                                                                                                                                           | None                                                                                                                                                                                                                               | $[Glu]_{syn}, I_{syn}$                                                    |
| Liu & (2013b)           | $I_{syn} \rightarrow V_m, post$<br>$I_{appl} \rightarrow V_m, I_{astro} \rightarrow V_m, I_{GWnoise} \rightarrow V_m, I_{syn} \rightarrow h_{Na}, m_{Na}, n_K, sE, sI, V_m$                                                                                                                                                                                          | $h_{Na}, m_{Na}, n_K, sE, sI, V_m$                                                                                                                                                                                      | $I_K, I_{Na}, I_{leak}$                                                                                                                                                                                                            | $I_{syn}, V_m$                                                            |
| Liu et al. (2016)       | $[2-AG]_{post} \rightarrow DSE \rightarrow p_{syn,rel}, [Glu]_{ext} \rightarrow e-SP \rightarrow p_{syn,rel}, I_{Poisson} \rightarrow p_{syn,rel} \rightarrow I_{syn} \rightarrow V_m, post$<br>$[Ca^{2+}]_{ast} \rightarrow g_{syn}, I_{const} \rightarrow V_m, I_{syn} \rightarrow V_m, post$                                                                      | $[2-AG]_{post}, e-SP, V_m, post$                                                                                                                                                                                        | None                                                                                                                                                                                                                               | $[2-AG]_{post}, I_{syn}$                                                  |
| Makovkin et al. (2020)  |                                                                                                                                                                                                                                                                                                                                                                      | $h_{Na}, m_{Na}, n_K, NT, V_m$                                                                                                                                                                                          | $I_K, I_{Na}, I_{leak}$                                                                                                                                                                                                            | $I_{syn}, NT$                                                             |
| Mesiti et al. (2015)    | $[Ca^{2+}]_{ast} \rightarrow [Ca^{2+}]_{pre}, [Ca^{2+}]_{last} \rightarrow p_{syn,rel}, I_{Poisson} \rightarrow p_{syn,rel} \rightarrow I_{syn} \rightarrow V_m, post$<br>$g_{syn,AMPA}/NMDAR, I_{ast,AMPA}/NMDAR \rightarrow V_m, postdend, I_{astro} \rightarrow V_m, presoma, I_{const} \rightarrow V_m, dend/soma, I_{syn,AMPA}/NMDAR \rightarrow V_m, postdend$ | $cKCa, [Ca^{2+}]_{pre}, h_{Na}, n_KDR, q_{sAHP}, s_{AMPA}post$<br>(separately for synaptic and astrocytic activation),<br>$sCa, sNMDARpost$ (separately for synaptic and astrocytic activation), $V_m, dend, V_m, soma$ | $I_{Ca}, I_{KCa}, I_{KDR}, I_{Na}, I_{sAHP}, I_{leak,dend}, I_{leak,soma}, I_{coupling}$ (in addition for $Ca^{2+}$ in pre N: degradation, production by $[Ca^{2+}]_{last}$ ; in post N: production by $F_{pre}$ and $V_m, soma$ ) | $I_{syn,AMPA}, I_{syn,NMDAR}, V_m, soma$                                  |
| Naeem et al. (2015)     | $[2-AG]_{post} \rightarrow DSE \rightarrow p_{syn,rel}, [Glu]_{ext} \rightarrow e-SP \rightarrow p_{syn,rel}, I_{Poisson} \rightarrow p_{syn,rel} \rightarrow I_{syn} \rightarrow V_m, post$                                                                                                                                                                         | $[2-AG]_{post}, e-SP, V_m, post$                                                                                                                                                                                        | None                                                                                                                                                                                                                               | $[2-AG]_{post}, I_{syn}$                                                  |
| Nazari & Faez (2019)    | $I_{ast} \rightarrow x_{AMPA}/GABAR \rightarrow I_{syn,AMPA}/GABAR \rightarrow V_m, PY/IN, I_{Poisson} \rightarrow V_m, I_{syn,AMPA}/GABAR \rightarrow V_m, post$                                                                                                                                                                                                    | $I_{syn,AMPA}, I_{syn,GABAR}, u, V_m, x_{AMPA}, x_{GABAR}$                                                                                                                                                              | None                                                                                                                                                                                                                               | $I_{syn,AMPA}, I_{syn,GABAR}, NT$                                         |
| Nazari et al. (2020)    | $I_{ast} \rightarrow x_{AMPA}/GABAR \rightarrow I_{syn,AMPA}/GABAR \rightarrow V_m, PY/IN, I_{Poisson} \rightarrow V_m, I_{syn,AMPA}/GABAR \rightarrow V_m, post$                                                                                                                                                                                                    | $I_{syn,AMPA}, I_{syn,GABAR}, V_m, x_{AMPA}, x_{GABAR}$                                                                                                                                                                 | None                                                                                                                                                                                                                               | $I_{syn,AMPA}, I_{syn,GABAR}, NT$                                         |
| Postnov et al. (2009)   | $I_{appl} \rightarrow w_{pre}, I_{ast,ATP}/Glu \rightarrow w_{post}, I_{const} \rightarrow w, I_{syn} \rightarrow w_{post}$                                                                                                                                                                                                                                          | $V_m, w, z$                                                                                                                                                                                                             | None                                                                                                                                                                                                                               | $I_{syn}, w, z$                                                           |
| Soleimani et al. (2015) | $I_{ast} \rightarrow X, I_{ast} \rightarrow Y, I_{syn} \rightarrow X_{post}, I_{syn} \rightarrow Y_{post}$                                                                                                                                                                                                                                                           | $X, Y$                                                                                                                                                                                                                  | None                                                                                                                                                                                                                               | $I_{syn}, Z$                                                              |
| Stimberg et al. (2019)  | $[GT] \rightarrow sRpre \rightarrow p_{syn,rel}, I_{const} \rightarrow V_m, I_{syn} \rightarrow V_m, post$                                                                                                                                                                                                                                                           | $[NT], sE, sI, sRpre, u_{syn}, V_m, x_{syn}$                                                                                                                                                                            | $I_{leak}$                                                                                                                                                                                                                         | $I_{syn}, [NT]$                                                           |
| Tang et al. (2017)      | $I_{astro} \rightarrow V_m, I_{Unoise} \rightarrow V_m, S \rightarrow V_m, post$                                                                                                                                                                                                                                                                                     | $u, V_m$                                                                                                                                                                                                                | None                                                                                                                                                                                                                               | $V_m$                                                                     |
| Yang & Yeo (2015)       | $[ATP]_{ext} \rightarrow NMDAR_{post}, [Glu]_{ext} \rightarrow NMDAR_{post}, [Glu]_{syn}$                                                                                                                                                                                                                                                                            | n/a                                                                                                                                                                                                                     | n/a                                                                                                                                                                                                                                | $[Glu]_{syn}$                                                             |
| Yao et al. (2018)       | $I_{appl} \rightarrow V_m, I_{syn,K}/NaNMDAR \rightarrow V_m, post$ ( $[Glu]_{ext}$ ), $[K^+]_{ext}, [Na^+]_{ext}$                                                                                                                                                                                                                                                   | $[Glu]_{ext}, h_{KA}, h_{NaP}, h_{NaT}, [K^+], m_{NaP}, m_{NaT}, n_{KA}, n_{KDR}, [Na^+], sNMDAR, V_m$                                                                                                                  | $I_{KA}, I_{KDR}, I_{Kleak}, I_{Kpump}, I_{NaP}, I_{NaT}, I_{NaPump}, I_{NaLeak}, I_{syn,KNMDAR}, I_{leak}, I_{syn,KNMDAR}, I_{syn,NaNMDAR}$                                                                                       | $[Glu]_{ext}, [K^+]_{ext}, [Na^+]_{ext}, I_{syn,KNMDAR}, I_{syn,NaNMDAR}$ |
| Yu et al. (2020)        | $I_{ast} \rightarrow V_m, PY/IN, I_{const} \rightarrow V_m, I_{noise} \rightarrow V_m, I_{syn} \rightarrow V_m, post$ (NT)                                                                                                                                                                                                                                           | $I_{slow}, sE, sI, V_m, W \approx n_K$                                                                                                                                                                                  | $I_{Ca}, I_{KDR}, I_{leak}, I_{slow}$                                                                                                                                                                                              | $I_{syn}, NT$                                                             |

Table S3: Characteristics of modeled astrocytes in the neuron-astrocyte network models. This table shows the inputs to the astrocytes, astrocytic variables and other variables representing, for example, molecules released from astrocytes described by differential equations, as well as astrocytic  $\text{Ca}^{2+}$  mechanisms related to cytosolic  $\text{Ca}^{2+}$ , astrocytic  $\text{IP}_3$  mechanisms, diffusion (Diff.) of astrocytic variables either in the cytosol or ER, and outputs of the astrocytes. Amounts modeled in concentrations are given inside square brackets,  $I_{\text{astro}} = 2.117(\ln(\Delta\text{Ca}))\ln(\Delta\text{Ca})$ , where  $\mathcal{H}$  is the heaviside function and  $\Delta\text{Ca} = [\text{Ca}^{2+}] - 196.69(\text{nM})$  (Nadkarni & Jung, 2003). In the models by Mesiti et al. (2015) and Li et al. (2020),  $I_{\text{ast,AMPA}} = \mathcal{H}_{\text{AMPA}} \text{AMPA} (V_{\text{m,post}} - V_{\text{AMPAR,post}})$  and  $I_{\text{ast,NMDAR}} = \mathcal{H}_{\text{NMDAR}} E_{\text{Mg}} \text{NMDAR} (V_{\text{m,post}} - V_{\text{NMDAR,post}})$ .

| Study                   | Inputs                                                                               | Variables                                                                                                                                                | $\text{Ca}^{2+}$ mechanisms                                                                                                  | $\text{IP}_3$ mechanisms                                                                                                                       | Diff.                                                                              | Outputs                                                                                                                 |
|-------------------------|--------------------------------------------------------------------------------------|----------------------------------------------------------------------------------------------------------------------------------------------------------|------------------------------------------------------------------------------------------------------------------------------|------------------------------------------------------------------------------------------------------------------------------------------------|------------------------------------------------------------------------------------|-------------------------------------------------------------------------------------------------------------------------|
| Abed et al. (2020)      | $\text{IP}_3, \text{NT} \rightarrow \text{IP}_3$                                     | $\text{Ca}^{2+}, \text{IP}_3$                                                                                                                            | CICR, efflux                                                                                                                 | Degradation, GJ, production by NT                                                                                                              | None                                                                               | $I_{\text{ast}} = c\text{Glu}_{\text{ext}}, \text{IP}_3$                                                                |
| Aleksin et al. (2017)   | $[\text{Ca}^{2+}], [\text{NT}] \rightarrow [\text{IP}_3]$                            | $[\text{Ca}^{2+}], h, [\text{IP}_3]$                                                                                                                     | CICR, GJ, leak from ER into cyt, SERCA                                                                                       | Degradation, production by NT                                                                                                                  | None                                                                               | $[\text{Ca}^{2+}]$                                                                                                      |
| Allegrini et al. (2009) | $[\text{Ca}^{2+}], [\text{IP}_3], V_{\text{m,pre}} \rightarrow [\text{IP}_3]$        | $[\text{Ca}^{2+}], [\text{IP}_3], R_{\text{in}}$                                                                                                         | CICR, efflux via pump, GJ, SERCA                                                                                             | Degradation, GJ, production by $V_{\text{m,pre}}$                                                                                              | $D_{\text{cyt}}: [\text{Ca}^{2+}], [\text{IP}_3]$                                  | $[\text{Ca}^{2+}], I_{\text{astro}}, [\text{IP}_3]$                                                                     |
| Amiri et al. (2012a)    | $[\text{IP}_3], \text{NT} \rightarrow [\text{IP}_3]$                                 | $[\text{Ca}^{2+}], f, h, [\text{IP}_3]$                                                                                                                  | CICR, leak from ER into cyt, SERCA                                                                                           | Degradation, GJ, production by NT                                                                                                              | None                                                                               | $I_{\text{ast}} = cf, [\text{IP}_3]$                                                                                    |
| Amiri et al. (2012b)    | $F_{\text{PY}} \rightarrow S_{\text{m}}, S_{\text{m}}$                               | $\text{Ca}^{2+}, \text{Ca}_{\text{ER}}^{2+}, S_{\text{m}} = \text{IP}_3$                                                                                 | CICR, efflux, influx, IP <sub>3</sub> -dependent influx, leak from ER into cyt, SERCA                                        | Degradation, GJ, production by $F_{\text{PY}}$                                                                                                 | None                                                                               | $G_{\text{m}}, S_{\text{m}}$                                                                                            |
| Amiri et al. (2012c)    | $F_{\text{PY}} \rightarrow S_{\text{m}}, S_{\text{m}}$                               | $\text{Ca}^{2+}, \text{Ca}_{\text{ER}}^{2+}, S_{\text{m}} = \text{IP}_3$                                                                                 | CICR, efflux, influx, IP <sub>3</sub> -dependent influx, leak from ER into cyt, SERCA                                        | Degradation, GJ, production by $F_{\text{PY}}$                                                                                                 | None                                                                               | $G_{\text{m}}, S_{\text{m}}$                                                                                            |
| Amiri et al. (2013a)    | $[\text{IP}_3], \text{NT} \rightarrow [\text{IP}_3]$                                 | $[\text{Ca}^{2+}], f, h, [\text{IP}_3]$                                                                                                                  | CICR, leak from ER into cyt, SERCA                                                                                           | Degradation, GJ, production by NT                                                                                                              | None                                                                               | $I_{\text{ast}} = cf, [\text{IP}_3]$                                                                                    |
| Chan et al. (2017)      | $[\text{IP}_3], V_{\text{m,N}} \rightarrow [\text{IP}_3]$                            | $[\text{Ca}^{2+}], f, h, [\text{IP}_3]$                                                                                                                  | CICR, leak from ER into cyt, SERCA                                                                                           | Degradation, GJ, production by $V_{\text{m,N}}$ (PLC $\beta$ ), production by $\text{Ca}^{2+}$ (PLC $\delta$ )                                 | None                                                                               | $I_{\text{ast}} = cf, [\text{IP}_3]$                                                                                    |
| Gordleeva et al. (2019) | $[\text{Ca}^{2+}], \text{Glu}_{\text{syn}} \rightarrow [\text{IP}_3], [\text{IP}_3]$ | $[\text{Ca}^{2+}], [\text{Ca}^{2+}]_{\text{ER}}, \text{D-serine}_{\text{ext}}, \text{Glu}_{\text{ext}}, h, [\text{IP}_3]$                                | CICR, GJ, leak from ER into cyt, SERCA                                                                                       | Degradation by IP <sub>3</sub> -3K, degradation by IP-5P, GJ, production by Glu (PLC $\beta$ ), production by $\text{Ca}^{2+}$ (PLC $\delta$ ) | $D_{\text{cyt}}: [\text{Ca}^{2+}], [\text{IP}_3]; D_{\text{ER}}: [\text{Ca}^{2+}]$ | $[\text{Ca}^{2+}], \text{D-serine}_{\text{ext}}, \text{Glu}_{\text{ext}}, [\text{IP}_3]$                                |
| Haghiri et al. (2016)   | $u_{\text{post}} \rightarrow \text{Ca}^{2+}, z \rightarrow S_{\text{m}}$             | $\text{Ca}^{2+}, \text{Ca}_{\text{ER}}^{2+}, S_{\text{m}} = \text{IP}_3$                                                                                 | CICR, efflux, influx, IP <sub>3</sub> -dependent influx, leak from ER into cyt, SERCA, $V_{\text{m,post}}$ -dependent influx | Degradation, production by $z$                                                                                                                 | None                                                                               | $I_{\text{ast}} = c\text{G}_{\text{m}}, I_{\text{syn}} = (k - c\text{G}_{\text{m}})(z - z_0)$                           |
| Haghiri et al. (2017)   | $u_{\text{post}} \rightarrow \text{Ca}^{2+}, z \rightarrow S_{\text{m}}$             | $\text{Ca}^{2+}, \text{Ca}_{\text{ER}}^{2+}, G_{\text{a}} = \text{ATP}_{\text{ext}}, G_{\text{m}} = \text{Glu}_{\text{ext}}, S_{\text{m}} = \text{IP}_3$ | CICR, efflux, influx, IP <sub>3</sub> -dependent influx, leak from ER into cyt, SERCA, $V_{\text{m,post}}$ -dependent influx | Degradation, production by $z$                                                                                                                 | None                                                                               | $I_{\text{ast,ATP}} = cG_{\text{a}}, I_{\text{ast,Glu}} = cG_{\text{m}}, I_{\text{syn}} = (k - cG_{\text{m}})(z - z_0)$ |
| Haghiri & Ahmadi (2020) | $u_{\text{post}} \rightarrow \text{Ca}^{2+}, z \rightarrow S_{\text{m}}$             | $\text{Ca}^{2+}, \text{Ca}_{\text{ER}}^{2+}, \text{Glu}_{\text{ext}}, S_{\text{m}} = \text{IP}_3$                                                        | CICR, efflux, influx, IP <sub>3</sub> -dependent influx, leak from ER into cyt, SERCA, $V_{\text{m,post}}$ -dependent influx | Degradation, production by $z$                                                                                                                 | None                                                                               | $I_{\text{ast}} = c\text{G}_{\text{m}}, I_{\text{syn}} = (k - c\text{G}_{\text{m}})(z - z_0)$                           |
| Hayati et al. (2016)    | $u_{\text{post}} \rightarrow \text{Ca}^{2+}, z \rightarrow S_{\text{m}}$             | $\text{Ca}^{2+}, G_{\text{m}}, S_{\text{m}} = \text{IP}_3$                                                                                               | Efflux, influx, IP <sub>3</sub> -dependent influx, $V_{\text{m,post}}$ -dependent influx                                     | Degradation, production by $z$                                                                                                                 | None                                                                               | $I_{\text{ast}} = c\text{G}_{\text{m}}, I_{\text{syn}} = (k - c\text{G}_{\text{m}})(z - z_0)$                           |
| Kanakov et al. (2019)   | $[\text{Ca}^{2+}], [\text{IP}_3]$                                                    | $[\text{Ca}^{2+}], h, [\text{IP}_3]$                                                                                                                     | CCE, CICR, efflux, GJ, leak from ER into cyt, leak from ext into cyt, SERCA                                                  | Degradation, GJ, production by $\text{Ca}^{2+}$ (PLC $\delta$ )                                                                                | None                                                                               | $[\text{Ca}^{2+}], [\text{IP}_3]$                                                                                       |

Continued on next page

Table S3: Characteristics of modeled astrocytes in the neuron-astrocyte network models – Continued

| Study                   | Inputs                                                                                                                | Variables                                                                                              | Ca <sup>2+</sup> mechanisms                                                                                               | IP <sub>3</sub> mechanisms                                                                                                                                                                | Diff.                                                      | Outputs                                                                                                  |
|-------------------------|-----------------------------------------------------------------------------------------------------------------------|--------------------------------------------------------------------------------------------------------|---------------------------------------------------------------------------------------------------------------------------|-------------------------------------------------------------------------------------------------------------------------------------------------------------------------------------------|------------------------------------------------------------|----------------------------------------------------------------------------------------------------------|
| Lenk et al. (2020)      | [IP <sub>3</sub> ], NT → [IP <sub>3</sub> ]                                                                           | [Ca <sup>2+</sup> ], [IP <sub>3</sub> ]                                                                | Accumulation rate                                                                                                         | Degradation, GJ, production by NT                                                                                                                                                         | None                                                       | [Ca <sup>2+</sup> ], [IP <sub>3</sub> ], S <sub>ast</sub>                                                |
| Li et al. (2016)        | [IP <sub>3</sub> ], NT → [IP <sub>3</sub> ]                                                                           | [ATP] <sub>ext</sub> , [Ca <sup>2+</sup> ], [Glu] <sub>ext</sub> , <i>h</i> , [IP <sub>3</sub> ]       | CICR, leak from ER into cyt, SERCA                                                                                        | Degradation, GJ, production by NT                                                                                                                                                         | None                                                       | $I_{ast,ATP} = c[ATP]_{ext}$ , $I_{ast,Glu} = c[Glu]_{ext}$ , [IP <sub>3</sub> ]                         |
| Li et al. (2020)        | [GABA] <sub>ext</sub> → [IP <sub>3</sub> ], $x_{ext}$ → [Glu] <sub>syn</sub> → [IP <sub>3</sub> ], [IP <sub>3</sub> ] | [Ca <sup>2+</sup> ], [Glu] <sub>ext</sub> , <i>h</i> , [IP <sub>3</sub> ], $x_{ext}$                   | CICR, leak from ER into cyt, SERCA                                                                                        | Degradation, GJ, production by GABA, production by Glu                                                                                                                                    | None                                                       | [Glu] <sub>ext</sub> , $I_{ast,AMPAR}$ , $I_{ast,NMDAR}$ , [IP <sub>3</sub> ]                            |
| Liu & Li (2013a)        | [Ca <sup>2+</sup> ], [Glu] <sub>syn</sub> → [IP <sub>3</sub> ]                                                        | [Ca <sup>2+</sup> ], [IP <sub>3</sub> ], $R_{ac}$                                                      | CICR, efflux via pump, GJ, leak from ER into cyt, SERCA                                                                   | Degradation, GJ, production by Ca <sup>2+</sup> (PLC $\delta$ ), production by Glu                                                                                                        | D <sub>cyt</sub> : [Ca <sup>2+</sup> ], [IP <sub>3</sub> ] | [Ca <sup>2+</sup> ], $I_{astro}$ , [IP <sub>3</sub> ]                                                    |
| Liu & Li (2013b)        | [Ca <sup>2+</sup> ], [IP <sub>3</sub> ], $V_{m,pre}$ → [IP <sub>3</sub> ]                                             | [Ca <sup>2+</sup> ], [IP <sub>3</sub> ], $R_{ac}$                                                      | CICR, efflux via pump, GJ, leak from ER into cyt, SERCA                                                                   | Degradation, GJ, production by Ca <sup>2+</sup> (PLC $\delta$ ), production by $V_{m,pre}$                                                                                                | D <sub>cyt</sub> : [Ca <sup>2+</sup> ], [IP <sub>3</sub> ] | [Ca <sup>2+</sup> ], $I_{astro}$ , [IP <sub>3</sub> ]                                                    |
| Liu et al. (2016)       | [2-AG] <sub>post</sub> → [IP <sub>3</sub> ], [IP <sub>3</sub> ]                                                       | [Ca <sup>2+</sup> ], [Glu] <sub>ext</sub> , <i>h</i> , [IP <sub>3</sub> ]                              | CICR, leak from ER into cyt, SERCA                                                                                        | Degradation, GJ, production by 2-AG                                                                                                                                                       | None                                                       | [Glu] <sub>ext</sub> , [IP <sub>3</sub> ]                                                                |
| Makovkin et al. (2020)  | [Ca <sup>2+</sup> ], [IP <sub>3</sub> ], NT → [IP <sub>3</sub> ]                                                      | [Ca <sup>2+</sup> ], <i>h</i> , [IP <sub>3</sub> ]                                                     | CCE, CICR, efflux, GJ, leak from ER into cyt, leak from ext into cyt, SERCA                                               | Degradation, GJ, production by Ca <sup>2+</sup> (PLC $\delta$ ), production by NT                                                                                                         | None                                                       | [Ca <sup>2+</sup> ], [IP <sub>3</sub> ]                                                                  |
| Mesiti et al. (2015)    | [Ca <sup>2+</sup> ], [IP <sub>3</sub> ], $V_{m,presoma}$ → [IP <sub>3</sub> ]                                         | [Ca <sup>2+</sup> ], [Ca <sup>2+</sup> ] <sub>ER</sub> , [IP <sub>3</sub> ]                            | CICR, efflux, influx, IP <sub>3</sub> -dependent influx, leak from ER into cyt, SERCA                                     | Degradation, GJ, production by $V_{m,presoma}$                                                                                                                                            | D <sub>cyt</sub> : [Ca <sup>2+</sup> ], [IP <sub>3</sub> ] | [Ca <sup>2+</sup> ], $I_{ast,AMPAR}$ , $I_{ast,NMDAR}$ , $I_{astro}$ , [IP <sub>3</sub> ]                |
| Naeem et al. (2015)     | [2-AG] <sub>post</sub> → [IP <sub>3</sub> ], [IP <sub>3</sub> ]                                                       | [Ca <sup>2+</sup> ], [Glu] <sub>ext</sub> , <i>h</i> , [IP <sub>3</sub> ]                              | CICR, leak from ER into cyt, SERCA                                                                                        | Degradation, GJ, production by 2-AG                                                                                                                                                       | None                                                       | [Glu] <sub>ext</sub> , [IP <sub>3</sub> ]                                                                |
| Nazari & Faez (2019)    | [IP <sub>3</sub> ], NT → [IP <sub>3</sub> ]                                                                           | [Ca <sup>2+</sup> ], <i>h</i> , [IP <sub>3</sub> ]                                                     | CICR, leak from ER into cyt, SERCA                                                                                        | Degradation, GJ, production by NT                                                                                                                                                         | None                                                       | $I_{ast} = c[Ca^{2+}]$ , [IP <sub>3</sub> ]                                                              |
| Nazari et al. (2020)    | [IP <sub>3</sub> ], NT → [IP <sub>3</sub> ]                                                                           | [Ca <sup>2+</sup> ], <i>h</i> , [IP <sub>3</sub> ]                                                     | CICR, leak from ER into cyt, SERCA                                                                                        | Degradation, GJ, production by NT                                                                                                                                                         | None                                                       | $I_{ast} = c[Ca^{2+}]$ , [IP <sub>3</sub> ]                                                              |
| Postnov et al. (2009)   | Ca <sup>2+</sup> , $G_a$ , $G_m$ , $S_m$ , $w_{post}$ → Ca <sup>2+</sup> , $z$ → $S_m$                                | Ca <sup>2+</sup> , $G_a$ , $G_m$ , $S_m = IP_3$ , $G_a = ATP_{ext}$ , $G_m = Glu_{ext}$ , $S_m = IP_3$ | CICR, efflux, GJ, influx, IP <sub>3</sub> -dependent influx, leak from ER into cyt, SERCA, $V_{m,post}$ -dependent influx | Degradation, GJ, production by $z$                                                                                                                                                        | D <sub>cyt</sub> : [Ca <sup>2+</sup> ], [IP <sub>3</sub> ] | Ca <sup>2+</sup> , $I_{ast,ATP} = cG_a$ , $I_{ast,Glu} = cG_m$ , $I_{syn} = (k - cG_m)(z - z_0)$ , $S_m$ |
| Soleimani et al. (2015) | $Z$ → $S_m$                                                                                                           | Ca <sup>2+</sup> , $S_m = IP_3$                                                                        | Efflux, influx, IP <sub>3</sub> -dependent influx                                                                         | Degradation, production by $Z$                                                                                                                                                            | None                                                       | $I_{ast} = cCa^{2+}$                                                                                     |
| Stimberg et al. (2019)  | [IP <sub>3</sub> ], [NT] → $s_mGluR$ → [IP <sub>3</sub> ]                                                             | [Ca <sup>2+</sup> ], [GT], <i>h</i> , [IP <sub>3</sub> ], $s_mGluR$ , $x_{ext}$                        | CICR, leak from ER into cyt, SERCA                                                                                        | Degradation by IP <sub>3</sub> -3K, degradation by IP <sub>3</sub> -5P, GJ, production by exogenous flow, production by NT (PLC $\beta$ ), production by Ca <sup>2+</sup> (PLC $\delta$ ) | None                                                       | [GT], [IP <sub>3</sub> ]                                                                                 |
| Tang et al. (2017)      | [IP <sub>3</sub> ], $V_{m,N}$ → [IP <sub>3</sub> ]                                                                    | [Ca <sup>2+</sup> ], <i>h</i> , [IP <sub>3</sub> ]                                                     | CICR, leak from ER into cyt, SERCA                                                                                        | Degradation by IP <sub>3</sub> -3K, degradation by IP <sub>3</sub> -5P, GJ, production by exogenous flow, production by Ca <sup>2+</sup> (PLC $\delta$ ), production by $V_{m,N}$         | None                                                       | $I_{astro}$ , [IP <sub>3</sub> ]                                                                         |
| Yang & Yeo (2015)       | [ATP] <sub>ext</sub> , [Glu] <sub>ext</sub> , [Glu] <sub>syn</sub> → [IP <sub>3</sub> ], [IP <sub>3</sub> ]           | [ATP] <sub>ext</sub> , [Ca <sup>2+</sup> ], [Glu] <sub>ext</sub> , <i>h</i> , [IP <sub>3</sub> ]       | CICR, leak from ER into cyt, SERCA                                                                                        | Degradation, GJ, production by Glu                                                                                                                                                        | None                                                       | [ATP] <sub>ext</sub> , [Glu] <sub>ext</sub> , [IP <sub>3</sub> ]                                         |

Continued on next page



Table S3: Characteristics of modeled astrocytes in the neuron-astrocyte network models – Continued

| Study             | Inputs                                                                                            | Variables                                                                                                                                                                                                                                                                                                                                                                         | Ca <sup>2+</sup> mechanisms                                                                                                                                                                                                                                                                                    | IP <sub>3</sub> mechanisms                                                       | Diff. | Outputs                                                                                                               |
|-------------------|---------------------------------------------------------------------------------------------------|-----------------------------------------------------------------------------------------------------------------------------------------------------------------------------------------------------------------------------------------------------------------------------------------------------------------------------------------------------------------------------------|----------------------------------------------------------------------------------------------------------------------------------------------------------------------------------------------------------------------------------------------------------------------------------------------------------------|----------------------------------------------------------------------------------|-------|-----------------------------------------------------------------------------------------------------------------------|
| Yao et al. (2018) | [ATP] <sub>ext</sub> ,<br>[K <sup>+</sup> ] <sub>ext</sub> ,<br>[Na <sup>+</sup> ] <sub>ext</sub> | $\chi$ , [ATP] <sub>ext</sub> , [Ca <sup>2+</sup> ],<br>[Ca <sup>2+</sup> ] <sub>ER</sub> , G,<br>[Glu] <sub>ext</sub> , $h$ , $h_{\text{NaF}}$ ,<br>$h_{\text{NaT}}$ , [IP <sub>3</sub> ], [K <sup>+</sup> ],<br>[K <sup>+</sup> ] <sub>ext</sub> , $m_{\text{NaF}}$ ,<br>$m_{\text{NaT}}$ , $m_{\text{KDR}}$ ,<br>[Na <sup>+</sup> ], [Na <sup>+</sup> ] <sub>ext</sub> , $V_m$ | Buffer, CICR, leak from ER into<br>cyt, leak from ext into cyt, PMCA,<br>SERCAs (In addition for K <sup>+</sup> and<br>Na <sup>+</sup> : $I_{\text{KDR}}$ , $I_{\text{Kleak}}$ , $I_{\text{Kpump}}$ , $I_{\text{NaP}}$ ,<br>$I_{\text{NaT}}$ , $I_{\text{NaLeak}}$ , $I_{\text{NaPump}}$ , $I_{\text{leak}}$ ) | Degradation, production by Ca <sup>2+</sup> ,<br>G protein, and PIP <sub>2</sub> | None  | [ATP] <sub>ext</sub> , [Glu] <sub>ext</sub> , [K <sup>+</sup> ] <sub>ext</sub> ,<br>[Na <sup>+</sup> ] <sub>ext</sub> |
| Yu et al. (2020)  | [IP <sub>3</sub> ], NT →<br>[IP <sub>3</sub> ]                                                    | [Ca <sup>2+</sup> ], $f$ , $h$ , [IP <sub>3</sub> ]                                                                                                                                                                                                                                                                                                                               | CICR, leak from ER into cyt,<br>SERCAs                                                                                                                                                                                                                                                                         | Degradation, G <sub>J</sub> , production by<br>NT                                | None  | $I_{\text{ast}} = c \sum f$ , [IP <sub>3</sub> ]                                                                      |

## References

- Abed, B., Ayyoub, B., Ismail, A. R., & Abdul, N. (2020). Two suggested probabilistic and kinetic models for astrocytic network in spiking neural networks. *International Journal of Advanced Trends in Computer Science and Engineering*, 9(5), 7951–7957. <https://doi.org/10.30534/ijatcse/2020/149952020>
- Aleksin, S. G., Zheng, K., Rusakov, D. A., & Savtchenko, L. P. (2017). ARACHNE: A neural-neuroglial network builder with remotely controlled parallel computing. *PLoS Computational Biology*, 13(3), e1005467. <https://doi.org/10.1371/journal.pcbi.1005467>
- Allegrini, P., Fronzoni, L., & Pirino, D. (2009). The influence of the astrocyte field on neuronal dynamics and synchronization. *Journal of Biological Physics*, 35(4), 413–423. <https://doi.org/10.1007/s10867-009-9166-8>
- Amiri, M., Bahrami, F., & Janahmadi, M. (2011). Functional modeling of astrocytes in epilepsy: a feedback system perspective. *Neural Computing and Applications*, 20(8), 1131–1139. <https://doi.org/10.1007/s00521-010-0479-0>
- Amiri, M., Bahrami, F., & Janahmadi, M. (2012a). Functional contributions of astrocytes in synchronization of a neuronal network model. *Journal of Theoretical Biology*, 292, 60–70. <https://doi.org/10.1016/j.jtbi.2011.09.013>
- Amiri, M., Bahrami, F., & Janahmadi, M. (2012b). Modified thalamocortical model: a step towards more understanding of the functional contribution of astrocytes to epilepsy. *Journal of Computational Neuroscience*, 33(2), 285–299. <https://doi.org/10.1007/s10827-012-0386-8>
- Amiri, M., Bahrami, F., & Janahmadi, M. (2012c). On the role of astrocytes in epilepsy: a functional modeling approach. *Neuroscience Research*, 72(2), 172–180. <https://doi.org/10.1016/j.neures.2011.11.006>
- Amiri, M., Hosseinmardi, N., Bahrami, F., & Janahmadi, M. (2013a). Astrocyte-neuron interaction as a mechanism responsible for generation of neural synchrony: a study based on modeling and experiments. *Journal of Computational Neuroscience*, 34(3), 489–504. <https://doi.org/10.1007/s10827-012-0432-6>
- Amiri, M., Montaseri, G., & Bahrami, F. (2013b). A phase plane analysis of neuron-astrocyte interactions. *Neural Networks*, 44, 157–165. <https://doi.org/10.1016/j.neunet.2013.03.018>
- Atri, A., Amundson, J., Clapham, D., & Sneyd, J. (1993). A single-pool model for intracellular calcium oscillations and waves in the *Xenopus laevis* oocyte. *Biophysical Journal*, 65(4), 1727–1739. [https://doi.org/10.1016/S0006-3495\(93\)81191-3](https://doi.org/10.1016/S0006-3495(93)81191-3)
- Bennett, M. R., Farnell, L., & Gibson, W. G. (2005). A quantitative model of purinergic junctional transmission of calcium waves in astrocyte networks. *Biophysical Journal*, 89(4), 2235–2250. <https://doi.org/10.1529/biophysj.105.062968>
- Bennett, M. R., Farnell, L., & Gibson, W. G. (2008). A quantitative model of cortical spreading depression due to purinergic and gap-junction transmission in astrocyte networks. *Biophysical Journal*, 95(12), 5648–5660. <https://doi.org/10.1529/biophysj.108.137190>
- Chan, S.-C., Mok, S.-Y., Ng, D. W.-K., & Goh, S.-Y. (2017). The role of neuron–glia interactions in the emergence of ultra-slow oscillations. *Biological Cybernetics*, 111, 459–472. <https://doi.org/10.1007/s00422-017-0740-z>
- Dayan, P. & Abbott, L. F. (2001). *Theoretical Neuroscience*. MIT Press.
- De Pittà, M. & Brunel, N. (2016). Modulation of synaptic plasticity by glutamatergic gliotransmission: a modeling study. *Neural Plasticity*, 2016, 7607924. <https://doi.org/10.1155/2016/7607924>
- De Pittà, M., Goldberg, M., Volman, V., Berry, H., & Ben-Jacob, E. (2009). Glutamate regulation of calcium and IP<sub>3</sub> oscillating and pulsating dynamics in astrocytes. *Journal of Biological Physics*, 35(4), 383–411. <https://doi.org/10.1007/s10867-009-9155-y>
- De Pittà, M., Volman, V., Berry, H., & Ben-Jacob, E. (2011). A tale of two stories: astrocyte regulation of synaptic depression and facilitation. *PLoS Computational Biology*, 7(12), e1002293. <https://doi.org/10.1371/journal.pcbi.1002293>

- De Pittà, M., Volman, V., Levine, H., Pioggia, G., De Rossi, D., & Ben-Jacob, E. (2008). Coexistence of amplitude and frequency modulations in intracellular calcium dynamics. *Physical Review E*, 77(3), 030903. <https://doi.org/10.1103/PhysRevE.77.030903>
- De Young, G. W. & Keizer, J. (1992). A single-pool inositol 1,4,5-trisphosphate-receptor-based model for agonist-stimulated oscillations in  $\text{Ca}^{2+}$  concentration. *Proceedings of the National Academy of Sciences of the United States of America*, 89(20), 9895–9899. <https://doi.org/10.1073/pnas.89.20.9895>
- Destexhe, A., Mainen, Z. F., & Sejnowski, T. J. (1994). Synthesis of models for excitable membranes, synaptic transmission and neuromodulation using a common kinetic formalism. *Journal of Computational Neuroscience*, 1(3), 195–230. <https://doi.org/10.1007/BF00961734>
- Destexhe, A., Mainen, Z. F., & Sejnowski, T. J. (1998). Kinetic models of synaptic transmission. *Methods in Neuronal Modeling*, 1–25. MIT Press.
- Dupont, G. & Goldbeter, A. (1993). One-pool model for  $\text{Ca}^{2+}$  oscillations involving  $\text{Ca}^{2+}$  and inositol 1,4,5-trisphosphate as co-agonists for  $\text{Ca}^{2+}$  release. *Cell Calcium*, 14(4), 311–322. [https://doi.org/10.1016/0143-4160\(93\)90052-8](https://doi.org/10.1016/0143-4160(93)90052-8)
- Esir, P. M., Gordleeva, S. Y., Simonov, A. Y., Pisarchik, A. N., & Kazantsev, V. B. (2018). Conduction delays can enhance formation of up and down states in spiking neuronal networks. *Physical Review E*, 98(5), 052401. <https://doi.org/10.1103/PhysRevE.98.052401>
- Fink, C. C., Slepchenko, B., & Loew, L. M. (1999). Determination of time-dependent inositol-1, 4, 5-trisphosphate concentrations during calcium release in a smooth muscle cell. *Biophysical Journal*, 77(1), 617–628. [https://doi.org/10.1016/S0006-3495\(99\)76918-3](https://doi.org/10.1016/S0006-3495(99)76918-3)
- FitzHugh, R. (1961). Impulses and physiological states in theoretical models of nerve membrane. *Biophysical Journal*, 1(6), 445–466. [https://doi.org/10.1016/S0006-3495\(61\)86902-6](https://doi.org/10.1016/S0006-3495(61)86902-6)
- Gerstner, W. & Kistler, W. M. (2002). *Spiking Neuron Models: Single Neurons, Populations, Plasticity*. Cambridge University Press. <https://doi.org/10.1017/CB09780511815706>
- Goldberg, M., De Pittà, M., Volman, V., Berry, H., & Ben-Jacob, E. (2010). Nonlinear gap junctions enable long-distance propagation of pulsating calcium waves in astrocyte networks. *PLoS Computational Biology*, 6(8), e1000909. <https://doi.org/10.1371/journal.pcbi.1000909>
- Gordleeva, S. Y., Ermolaeva, A. V., Kastalskiy, I. A., & Kazantsev, V. B. (2019). Astrocyte as spatiotemporal integrating detector of neuronal activity. *Frontiers in Physiology*, 10, 294. <https://doi.org/10.3389/fphys.2019.00294>
- Gordleeva, S. Y., Lebedev, S. A., Rumyantseva, M. A., & Kazantsev, V. B. (2018). Astrocyte as a detector of synchronous events of a neural network. *JETP Letters*, 107(7), 440–445. <https://doi.org/10.1134/S0021364018070032>
- Gordleeva, S. Y., Stasenko, S. V., Semyanov, A. V., Dityatev, A. E., & Kazantsev, V. B. (2012). Bi-directional astrocytic regulation of neuronal activity within a network. *Frontiers in Computational Neuroscience*, 6, 92. <https://doi.org/10.3389/fncom.2012.00092>
- Guo, D. & Li, C. (2011). Signal propagation in feedforward neuronal networks with unreliable synapses. *Journal of Computational Neuroscience*, 30(3), 567–587. <https://doi.org/10.1007/s10827-010-0279-7>
- Haghiri, S. & Ahmadi, A. (2020). An investigation on neuron–astrocyte interaction system: network behavior and synchronization. *Analog Integrated Circuits and Signal Processing*, 108, 569–576. <https://doi.org/10.1007/s10470-020-01735-5>
- Haghiri, S., Ahmadi, A., & Saif, M. (2016). VLSI implementable neuron-astrocyte control mechanism. *Neurocomputing*, 214, 280–296. <https://doi.org/10.1016/j.neucom.2016.06.015>
- Haghiri, S., Ahmadi, A., & Saif, M. (2017). Complete neuron-astrocyte interaction model: digital multiplierless design and networking mechanism. *IEEE Transactions on Biomedical Circuits and Systems*, 11(1), 117–127. <https://doi.org/10.1109/TBCAS.2016.2583920>

- Hayati, M., Nouri, M., Haghiri, S., & Abbott, D. (2016). A digital realization of astrocyte and neural glial interactions. *IEEE Transactions on Biomedical Circuits and Systems*, 10(2), 518–529. <https://doi.org/10.1109/TBCAS.2015.2450837>
- Hodgkin, A. L. & Huxley, A. F. (1952). A quantitative description of membrane current and its application to conduction and excitation in nerve. *Journal of Physiology*, 117(4), 500–544. <https://doi.org/10.1113/jphysiol.1952.sp004764>
- Höfer, T., Venance, L., & Giaume, C. (2002). Control and plasticity of intercellular calcium waves in astrocytes: a modeling approach. *Journal of Neuroscience*, 22(12), 4850–4859. <https://doi.org/10.1523/JNEUROSCI.22-12-04850.2002>
- Izhikevich, E. M. (2003). Simple model of spiking neurons. *IEEE Transactions on Neural Networks*, 14(6), 1569–1572. <https://doi.org/10.1109/TNN.2003.820440>
- Jahr, C. E. & Stevens, C. F. (1990). Voltage dependence of NMDA-activated macroscopic conductances predicted by single-channel kinetics. *Journal of Neuroscience*, 10(9), 3178–3182. <https://doi.org/10.1523/JNEUROSCI.10-09-03178.1990>
- Kager, H., Wadman, W. J., & Somjen, G. G. (2000). Simulated seizures and spreading depression in a neuron model incorporating interstitial space and ion concentrations. *Journal of Neurophysiology*, 84(1), 495–512. <https://doi.org/10.1152/jn.2000.84.1.495>
- Kanakov, O., Gordileeva, S., Ermolaeva, A., Jalan, S., & Zaikin, A. (2019). Astrocyte-induced positive integrated information in neuron-astrocyte ensembles. *Physical Review E*, 99(1), 012418. <https://doi.org/10.1103/PhysRevE.99.012418>
- Kazantsev, V. B. (2009). Spontaneous calcium signals induced by gap junctions in a network model of astrocytes. *Physical Review E*, 79(1), 010901. <https://doi.org/10.1103/PhysRevE.79.010901>
- Kopell, N., Börgers, C., Pervouchine, D., Malerba, P., & Tort, A. (2010). Gamma and theta rhythms in biophysical models of hippocampal circuits. *Hippocampal Microcircuits. Springer Series in Computational Neuroscience, vol 5.*, 423–457. Springer. [https://doi.org/10.1007/978-1-4419-0996-1\\_15](https://doi.org/10.1007/978-1-4419-0996-1_15)
- Kopell, N., Ermentrout, G. B., Whittington, M. A., & Traub, R. D. (2000). Gamma rhythms and beta rhythms have different synchronization properties. *Proceedings of the National Academy of Sciences of the United States of America*, 97(4), 1867–1872. <https://doi.org/10.1073/pnas.97.4.1867>
- Lallouette, J., De Pittà, M., Ben-Jacob, E., & Berry, H. (2014). Sparse short-distance connections enhance calcium wave propagation in a 3D model of astrocyte networks. *Frontiers in Computational Neuroscience*, 8, 45. <https://doi.org/10.3389/fncom.2014.00045>
- Larter, R. & Craig, M. G. (2005). Glutamate-induced glutamate release: a proposed mechanism for calcium bursting in astrocytes. *Chaos*, 15(4), 047511. <https://doi.org/10.1063/1.2102467>
- Latham, P. E., Richmond, B. J., Nelson, P. G., & Nirenberg, S. (2000). Intrinsic dynamics in neuronal networks. I. Theory. *Journal of Neurophysiology*, 83(2), 808–827. <https://doi.org/10.1152/jn.2000.83.2.808>
- Lemon, G., Gibson, W. G., & Bennett, M. R. (2003). Metabotropic receptor activation, desensitization and sequestration-I: Modelling calcium and inositol 1,4,5-trisphosphate dynamics following receptor activation. *Journal of Theoretical Biology*, 223(1), 93–111. [https://doi.org/10.1016/S0022-5193\(03\)00079-1](https://doi.org/10.1016/S0022-5193(03)00079-1)
- Lenk, K., Priwitzer, B., Ylä-Outinen, L., Tietz, L. H. B., Narkilahti, S., & Hyttinen, J. A. K. (2016). Simulation of developing human neuronal cell networks. *BioMedical Engineering OnLine*, 15, 105. <https://doi.org/10.1186/s12938-016-0226-6>
- Lenk, K., Satuvuori, E., Lallouette, J., Ladrón-de Guevara, A., Berry, H., & Hyttinen, J. A. K. (2020). A computational model of interactions between neuronal and astrocytic networks: The role of astrocytes in the stability of the neuronal firing rate. *Frontiers in Computational Neuroscience*, 13, 92. <https://doi.org/10.3389/fncom.2019.00092>

- Li, J.-J., Du, M.-M., Wang, R., Lei, J.-Z., & Wu, Y. (2016). Astrocytic gliotransmitter: diffusion dynamics and induction of information processing on tripartite synapses. *International Journal of Bifurcation and Chaos*, 26(8), 1650138. <https://doi.org/10.1142/S0218127416501388>
- Li, J. J., Xie, Y., Yu, Y. G., Du, M. M., Wang, R., & Wu, Y. (2017). A neglected GABAergic astrocyte: calcium dynamics and involvement in seizure activity. *Science China Technological Sciences*, 60(7), 1003–1010. <https://doi.org/10.1007/s11431-016-9056-2>
- Li, L., Zhou, J., Sun, H., Liu, J., Wang, H., Liu, X., & Wang, C. (2020). A computational model to investigate GABA-activated astrocyte modulation of neuronal excitation. *Computational and Mathematical Methods in Medicine*, 2020, 8750167. <https://doi.org/10.1155/2020/8750167>
- Li, Y.-X. & Rinzel, J. (1994). Equations for  $\text{InsP}_3$  receptor-mediated  $[\text{Ca}^{2+}]_i$  oscillations derived from a detailed kinetic model: a Hodgkin-Huxley like formalism. *Journal of Theoretical Biology*, 166(4), 461–473. <https://doi.org/10.1006/jtbi.1994.1041>
- Liu, J., Harkin, J., Maguire, L. P., McDaid, L. J., Wade, J. J., & Martin, G. (2016). Scalable networks-on-chip interconnected architecture for astrocyte-neuron networks. *IEEE Transactions on Circuits and Systems I: Regular Papers*, 63(12), 2290–2303. <https://doi.org/10.1109/TCSI.2016.2615051>
- Liu, Y. & Li, C. (2013a). Firing rate propagation through neuronal–astrocytic network. *IEEE Transactions on Neural Networks and Learning Systems*, 24(5), 789–799. <https://doi.org/10.1109/TNNLS.2013.2245678>
- Liu, Y. & Li, C. (2013b). Stochastic resonance in feedforward-loop neuronal network motifs in astrocyte field. *Journal of Theoretical Biology*, 335, 265–275. <https://doi.org/10.1016/j.jtbi.2013.07.007>
- Ma, J., Huang, L., Tang, J., Ying, H.-P., & Jin, W.-Y. (2012). Spiral wave death, breakup induced by ion channel poisoning on regular Hodgkin–Huxley neuronal networks. *Communications in Nonlinear Science and Numerical Simulation*, 17(11), 4281–4293. <https://doi.org/10.1016/j.cnsns.2012.03.009>
- Mainen, Z. F., Joerges, J., Huguenard, J. R., & Sejnowski, T. J. (1995). A model of spike initiation in neocortical pyramidal neurons. *Neuron*, 15(6), 1427–1439. [https://doi.org/10.1016/0896-6273\(95\)90020-9](https://doi.org/10.1016/0896-6273(95)90020-9)
- Mainen, Z. F. & Sejnowski, T. J. (1996). Influence of dendritic structure on firing pattern in model neocortical neurons. *Nature*, 382(6589), 363–366. <https://doi.org/10.1038/382363a0>
- Makovkin, S. Y., Shkerin, I. V., Gordleeva, S. Y., & Ivanchenko, M. V. (2020). Astrocyte-induced intermittent synchronization of neurons in a minimal network. *Chaos, Solitons & Fractals*, 138, 109951. <https://doi.org/10.1016/j.chaos.2020.109951>
- Mazzoni, A., Panzeri, S., Logothetis, N. K., & Brunel, N. (2008). Encoding of naturalistic stimuli by local field potential spectra in networks of excitatory and inhibitory neurons. *PLoS Computational Biology*, 4(12), e1000239. <https://doi.org/10.1371/journal.pcbi.1000239>
- Mesiti, F., Floor, P. A., & Balasingham, I. (2015). Astrocyte to neuron communication channels with applications. *IEEE Transactions on Molecular, Biological and Multi-Scale Communications*, 1(2), 164–175. <https://doi.org/10.1109/TMBMC.2015.2501743>
- Morris, C. & Lecar, H. (1981). Voltage oscillations in the barnacle giant muscle fiber. *Biophysical Journal*, 35(1), 193–213. [https://doi.org/10.1016/S0006-3495\(81\)84782-0](https://doi.org/10.1016/S0006-3495(81)84782-0)
- Nadkarni, S. & Jung, P. (2003). Spontaneous oscillations of dressed neurons: a new mechanism for epilepsy? *Physical Review Letters*, 91(26), 268101. <https://doi.org/10.1103/PhysRevLett.91.268101>
- Nadkarni, S. & Jung, P. (2005). Synaptic inhibition and pathologic hyperexcitability through enhanced neuron-astrocyte interaction: a modeling study. *Journal of Integrative Neuroscience*, 4(2), 207–226. <https://doi.org/10.1142/S0219635205000811>
- Nadkarni, S. & Jung, P. (2007). Modeling synaptic transmission of the tripartite synapse. *Physical Biology*, 4(1), 1–9. <https://doi.org/10.1088/1478-3975/4/1/001>

- Naeem, M., McDaid, L. J., Harkin, J., Wade, J. J., & Marsland, J. (2015). On the role of astroglial syncytia in self-repairing spiking neural networks. *IEEE Transactions on Neural Networks and Learning Systems*, 26(10), 2370–2380. <https://doi.org/10.1109/TNNLS.2014.2382334>
- Nazari, S., Amiri, M., Faez, K., & Van Hulle, M. M. (2020). Information transmitted from bioinspired neuron–astrocyte network improves cortical spiking network’s pattern recognition performance. *IEEE Transactions on Neural Networks and Learning Systems*, 31(2), 464–474. <https://doi.org/10.1109/TNNLS.2019.2905003>
- Nazari, S. & Faez, K. (2019). Empowering the impaired astrocytes in the tripartite synapses to improve accuracy of pattern recognition. *Soft Computing*, 23(17), 8307–8319. <https://doi.org/10.1007/s00500-018-03671-z>
- Olufsen, M. S., Whittington, M. A., Camperi, M., & Kopell, N. (2003). New roles for the gamma rhythm: population tuning and preprocessing for the beta rhythm. *Journal of Computational Neuroscience*, 14(1), 33–54. <https://doi.org/10.1023/A:1021124317706>
- Pinsky, P. F. & Rinzel, J. (1994). Intrinsic and network rhythmogenesis in a reduced Traub model for CA3 neurons. *Journal of Computational Neuroscience*, 1(1), 39–60. <https://doi.org/10.1007/BF00962717>
- Postnov, D. E., Koreshkov, R. N., Brazhe, N. A., Brazhe, A. R., & Sosnovtseva, O. V. (2009). Dynamical patterns of calcium signaling in a functional model of neuron-astrocyte networks. *Journal of Biological Physics*, 35(4), 425–445. <https://doi.org/10.1007/s10867-009-9156-x>
- Postnov, D. E., Ryazanova, L. S., & Sosnovtseva, O. V. (2007). Functional modeling of neural-glia interaction. *Biosystems*, 89(1), 84–91. <https://doi.org/10.1016/j.biosystems.2006.04.012>
- Prescott, S. A., Ratté, S., De Koninck, Y., & Sejnowski, T. J. (2008). Pyramidal neurons switch from integrators in vitro to resonators under in vivo-like conditions. *Journal of Neurophysiology*, 100(6), 3030–3042. <https://doi.org/10.1152/jn.90634.2008>
- Reddy, D. V. R., Sen, A., & Johnston, G. L. (2000). Dynamics of a limit cycle oscillator under time delayed linear and nonlinear feedbacks. *Physica D*, 144(3-4), 335–357. [https://doi.org/10.1016/S0167-2789\(00\)00086-5](https://doi.org/10.1016/S0167-2789(00)00086-5)
- Sahlender, D. A., Savtchouk, I., & Volterra, A. (2014). What do we know about gliotransmitter release from astrocytes? *Philosophical Transactions of the Royal Society B*, 369(1654), 20130592. <https://doi.org/10.1098/rstb.2013.0592>
- Shuai, J.-W. & Jung, P. (2002). Stochastic properties of  $\text{Ca}^{2+}$  release of inositol 1, 4, 5-trisphosphate receptor clusters. *Biophysical Journal*, 83(1), 87–97. [https://doi.org/10.1016/S0006-3495\(02\)75151-5](https://doi.org/10.1016/S0006-3495(02)75151-5)
- Silchenko, A. N. & Tass, P. A. (2008). Computational modeling of paroxysmal depolarization shifts in neurons induced by the glutamate release from astrocytes. *Biological Cybernetics*, 98(1), 61–74. <https://doi.org/10.1007/s00422-007-0196-7>
- Sneyd, J., Charles, A. C., & Sanderson, M. J. (1994). A model for the propagation of intercellular calcium waves. *American Journal of Physiology-Cell Physiology*, 266(1), C293–C302. <https://doi.org/10.1152/ajpcell.1994.266.1.C293>
- Sneyd, J., Wetton, B. T. R., Charles, A. C., & Sanderson, M. J. (1995). Intercellular calcium waves mediated by diffusion of inositol trisphosphate: a two-dimensional model. *American Journal of Physiology-Cell Physiology*, 268(6), C1537–C1545. <https://doi.org/10.1152/ajpcell.1995.268.6.C1537>
- Soleimani, H., Bavandpour, M., Ahmadi, A., & Abbott, D. (2015). Digital implementation of a biological astrocyte model and its application. *IEEE Transactions on Neural Networks and Learning Systems*, 26(1), 127–139. <https://doi.org/10.1109/TNNLS.2014.2311839>
- Somjen, G. G., Kager, H., & Wadman, W. J. (2008). Computer simulations of neuron-glia interactions mediated by ion flux. *Journal of Computational Neuroscience*, 25(2), 349–365. <https://doi.org/10.1007/s10827-008-0083-9>
- Stimberg, M., Goodman, D. F. M., Brette, R., & De Pittà, M. (2019). Modeling neuron–glia interactions with the Brian 2 simulator. *Computational Glioscience*, 471–505. Springer. [https://doi.org/10.1007/978-3-030-00817-8\\_18](https://doi.org/10.1007/978-3-030-00817-8_18)

- Suffczynski, P., Kalitzin, S., & Lopes Da Silva, F. H. (2004). Dynamics of non-convulsive epileptic phenomena modeled by a bistable neuronal network. *Neuroscience*, 126(2), 467–484. <https://doi.org/10.1016/j.neuroscience.2004.03.014>
- Tang, J., Zhang, J., Ma, J., Zhang, G. Y., & Yang, X. Q. (2017). Astrocyte calcium wave induces seizure-like behavior in neuron network. *Science China Technological Sciences*, 60(7), 1011–1018. <https://doi.org/10.1007/s11431-016-0293-9>
- Terman, D., Rubin, J. E., Yew, A. C., & Wilson, C. J. (2002). Activity patterns in a model for the subthalamo-pallidal network of the basal ganglia. *Journal of Neuroscience*, 22(7), 2963–2976. <https://doi.org/10.1523/JNEUROSCI.22-07-02963.2002>
- Tsodyks, M., Pawelzik, K., & Markram, H. (1998). Neural networks with dynamic synapses. *Neural Computation*, 10(4), 821–835. <https://doi.org/10.1162/089976698300017502>
- Ullah, G., Jung, P., & Cornell-Bell, A. H. (2006). Anti-phase calcium oscillations in astrocytes via inositol (1,4,5)-trisphosphate regeneration. *Cell Calcium*, 39(3), 197–208. <https://doi.org/10.1016/j.ceca.2005.10.009>
- Volman, V., Ben-Jacob, E., & Levine, H. (2007). The astrocyte as a gatekeeper of synaptic information transfer. *Neural Computation*, 19(2), 303–326. <https://doi.org/10.1162/neco.2007.19.2.303>
- Wade, J., McDaid, L., Harkin, J., Crunelli, V., & Kelso, S. (2012). Self-repair in a bidirectionally coupled astrocyte-neuron (AN) system based on retrograde signaling. *Frontiers in Computational Neuroscience*, 6, 76. <https://doi.org/10.3389/fncom.2012.00076>
- Wallach, G., Lallouette, J., Herzog, N., De Pittà, M., Jacob, E. B., Berry, H., & Hanein, Y. (2014). Glutamate mediated astrocytic filtering of neuronal activity. *PLoS Computational Biology*, 10(12), e1003964. <https://doi.org/10.1371/journal.pcbi.1003964>
- Yang, Y. & Yeo, C. K. (2015). Conceptual network model from sensory neurons to astrocytes of the human nervous system. *IEEE Transactions on Biomedical Engineering*, 62(7), 1843–1852. <https://doi.org/10.1109/TBME.2015.2405549>
- Yao, W., Huang, H., & Miura, R. M. (2011). A continuum neuronal model for the instigation and propagation of cortical spreading depression. *Bulletin of Mathematical Biology*, 73(11), 2773–2790. <https://doi.org/10.1007/s11538-011-9647-3>
- Yao, W., Huang, H., & Miura, R. M. (2018). Role of astrocyte in cortical spreading depression: a quantitative model of neuron-astrocyte network. *Communications in Computational Physics*, 23(2), 440–458. <https://doi.org/10.4208/cicp.0A-2016-0262>
- Yu, Y., Yuan, Z., Fan, Y., Li, J., & Wu, Y. (2020). Dynamic transitions in neuronal network firing sustained by abnormal astrocyte feedback. *Neural Plasticity*, 2020, 8864246. <https://doi.org/10.1155/2020/8864246>
